# Supplementary material for: Disruption of the microbiota across multiple body sites in critically ill children
Source: PubMed Central journal article supplement (PMC5200963; doi:10.1186/s40168-016-0211-0), 2016-12-29

**A**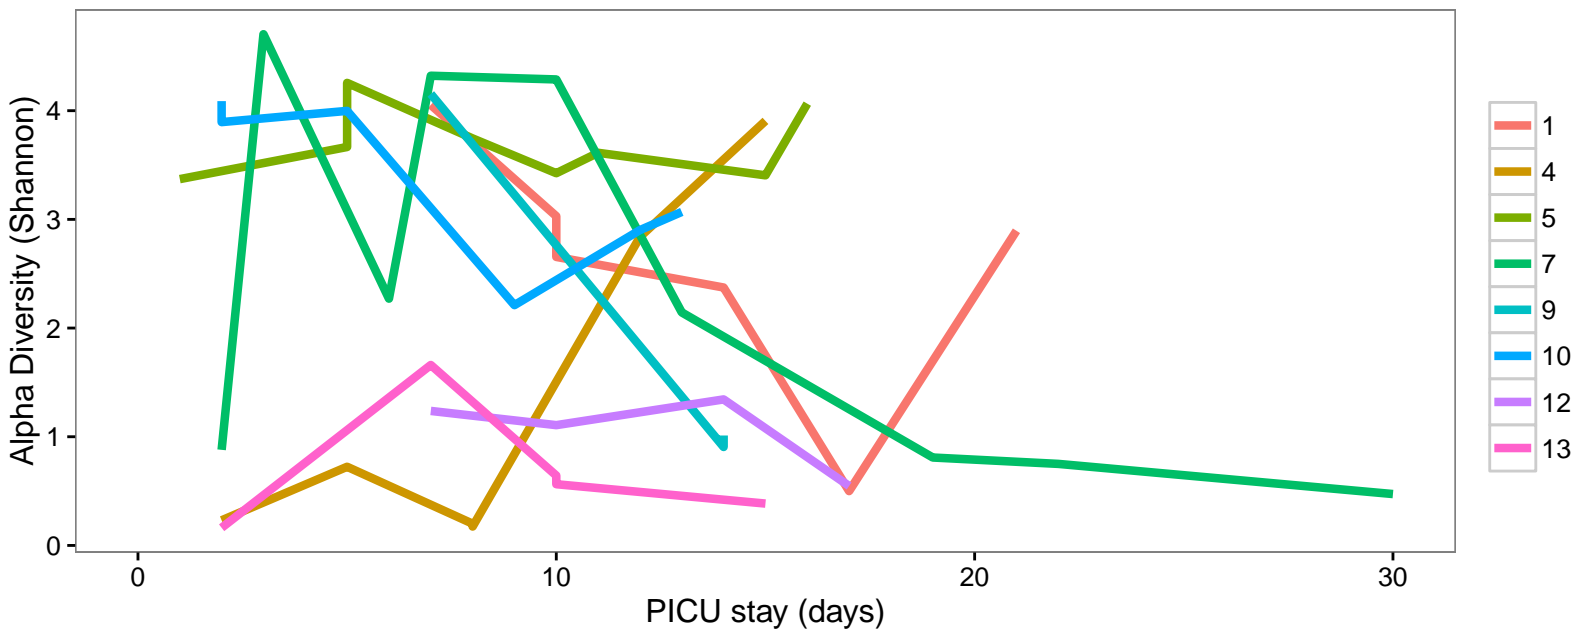**B**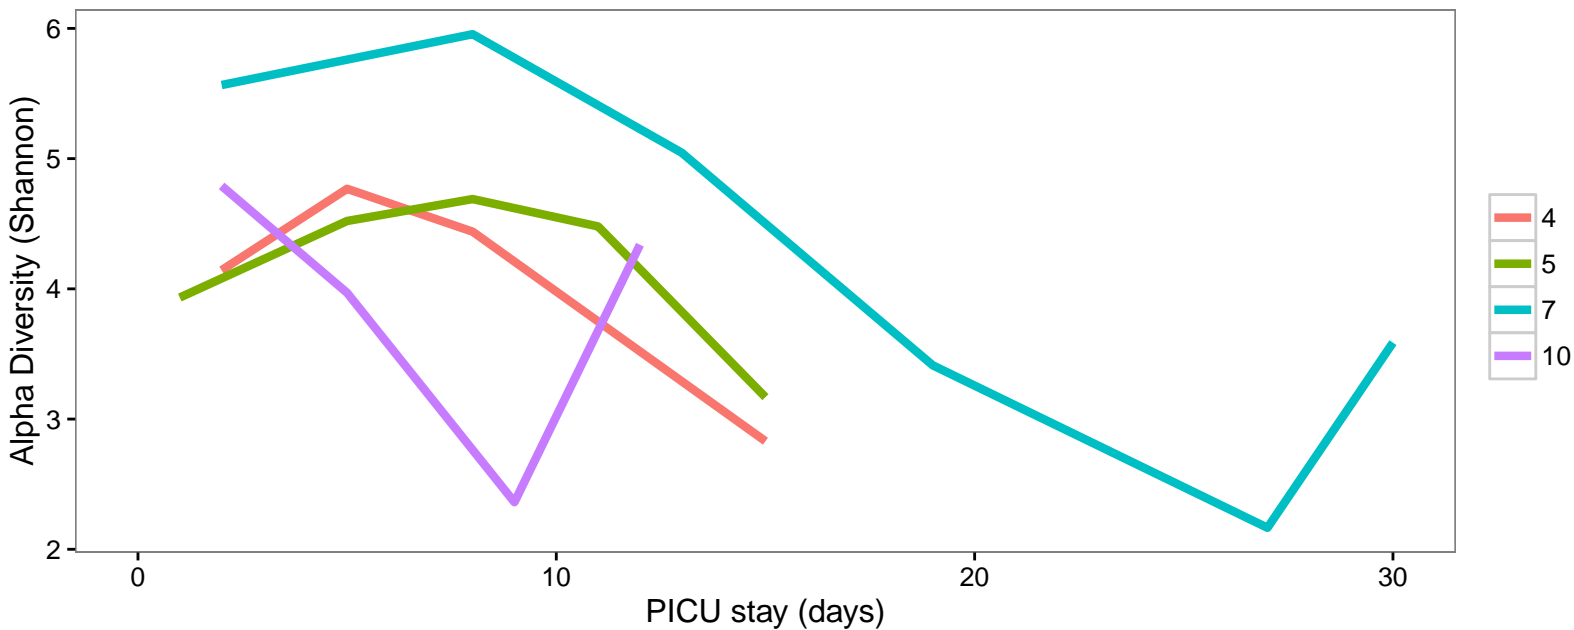**C**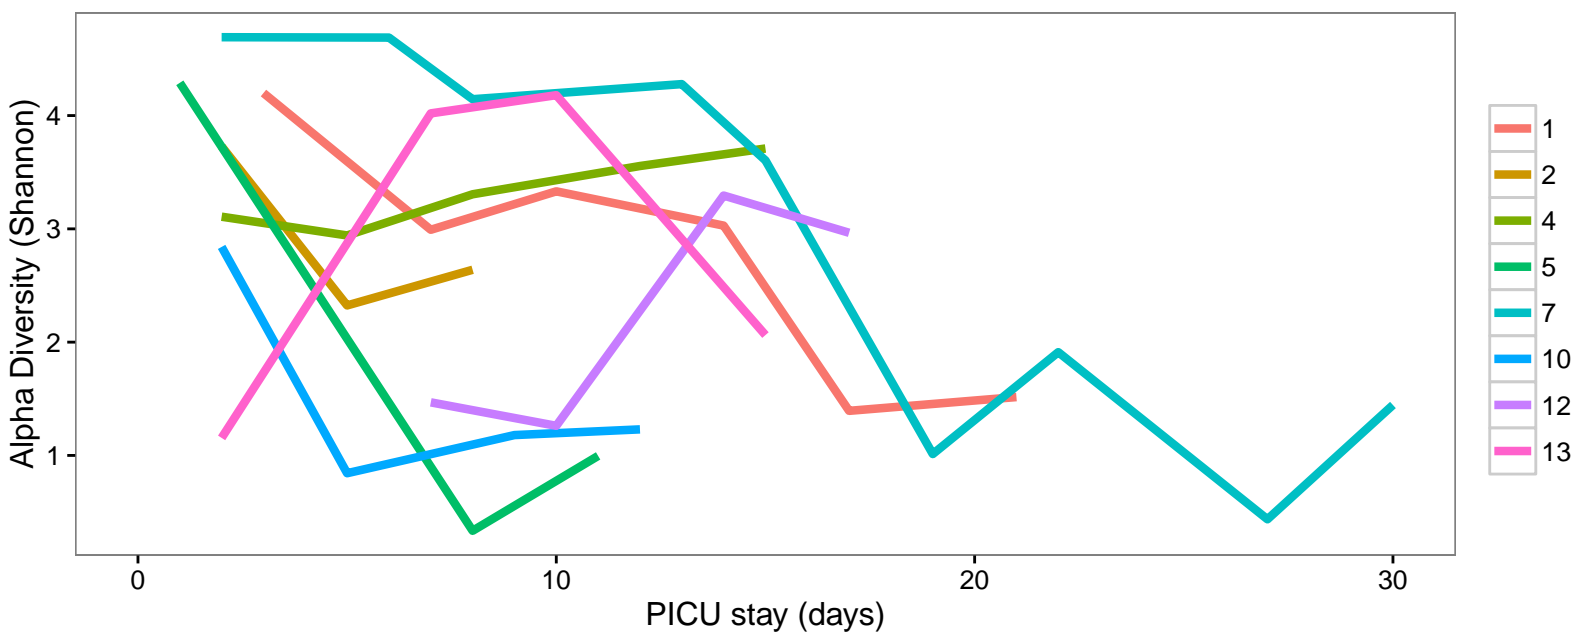

Supplement: 40168_2016_211_MOESM6_ESM.pdf [file 40168_2016_211_MOESM6_ESM.pdf]
