# Supplementary material for: Disruption of the microbiota across multiple body sites in critically ill children
Source: PubMed Central journal article supplement (PMC5200963; doi:10.1186/s40168-016-0211-0), 2016-12-29
Supplement: 40168_2016_211_MOESM8_ESM.pdf [file 40168_2016_211_MOESM8_ESM.pdf]

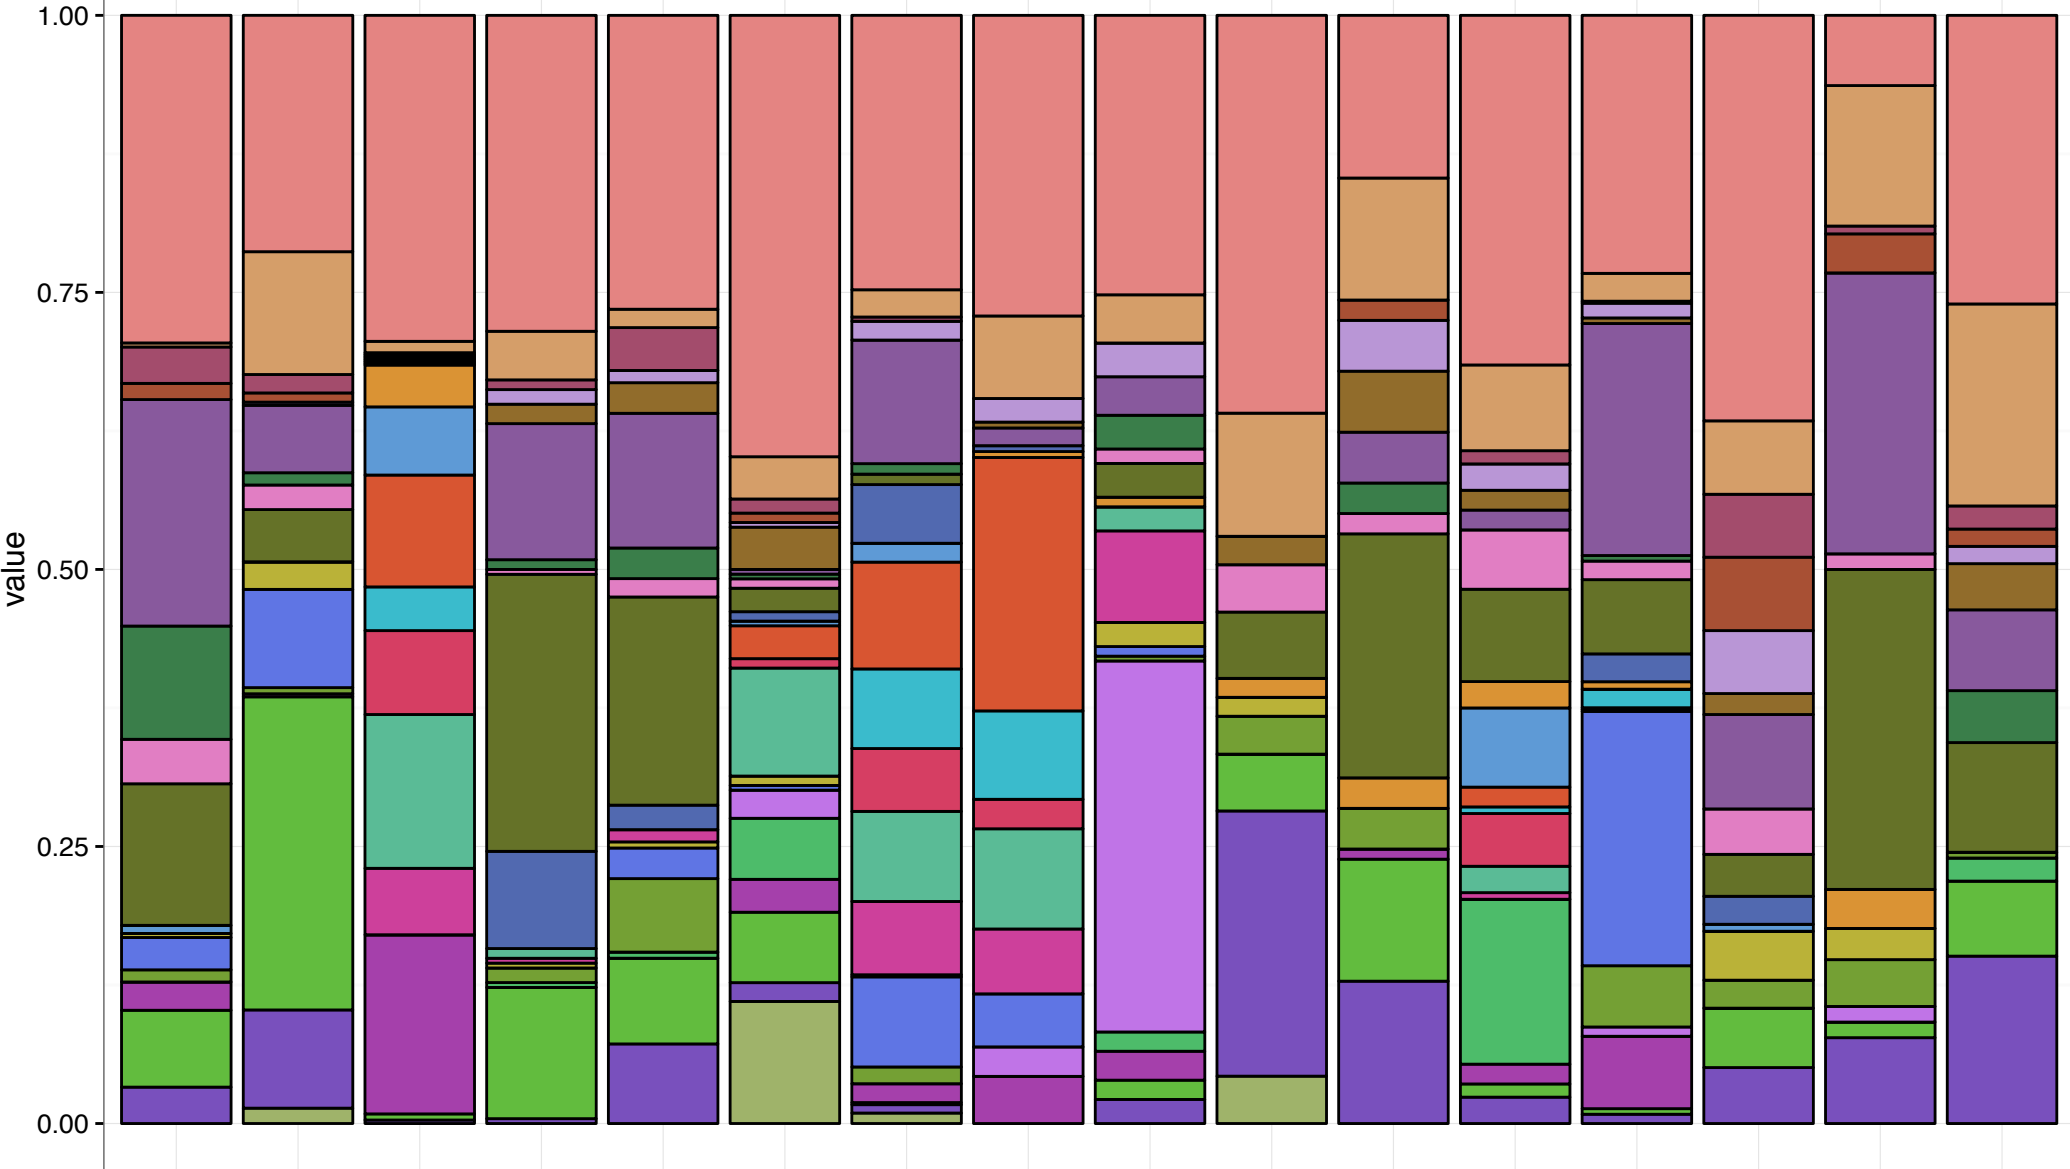

- |                   |                  |                   |                   |                      |                      |                 |
|-------------------|------------------|-------------------|-------------------|----------------------|----------------------|-----------------|
| Actinomyces       | Prevotella       | Staphylococcus    | Dorea             | Sphingomonadales.f.g | Diaphorobacter       | Moraxellaceae.g |
| Corynebacterium   | S24.7.g          | Clostridiales,f.g | Ruminococcus.     | Sphingobium          | Oxalobacteraceae.g   | Pseudomonas     |
| Propionibacterium | Cloacibacterium  | Lachnospiraceae.g | Ruminococcaceae.g | Comamonadaceae.g     | Herbaspirillum       | Remain          |
| Bacteroides       | Alicyclobacillus | Blautia           | Methylobacterium  | Comamonas            | Enterobacteriaceae.g |                 |
